# Supplementary material for: Antioxidant Enzymatic Activities and Growth Response of Quinoa (Chenopodium quinoa Willd) to Exogenous Selenium Application
Source: Plants (Basel). 2021 Apr 7;10(4):719. doi: 10.3390/plants10040719 (PMC8068041; doi:10.3390/plants10040719)
Supplement: Supplementary file 1 [file plants-10-00719-s001.pdf]

## Supplementary figures

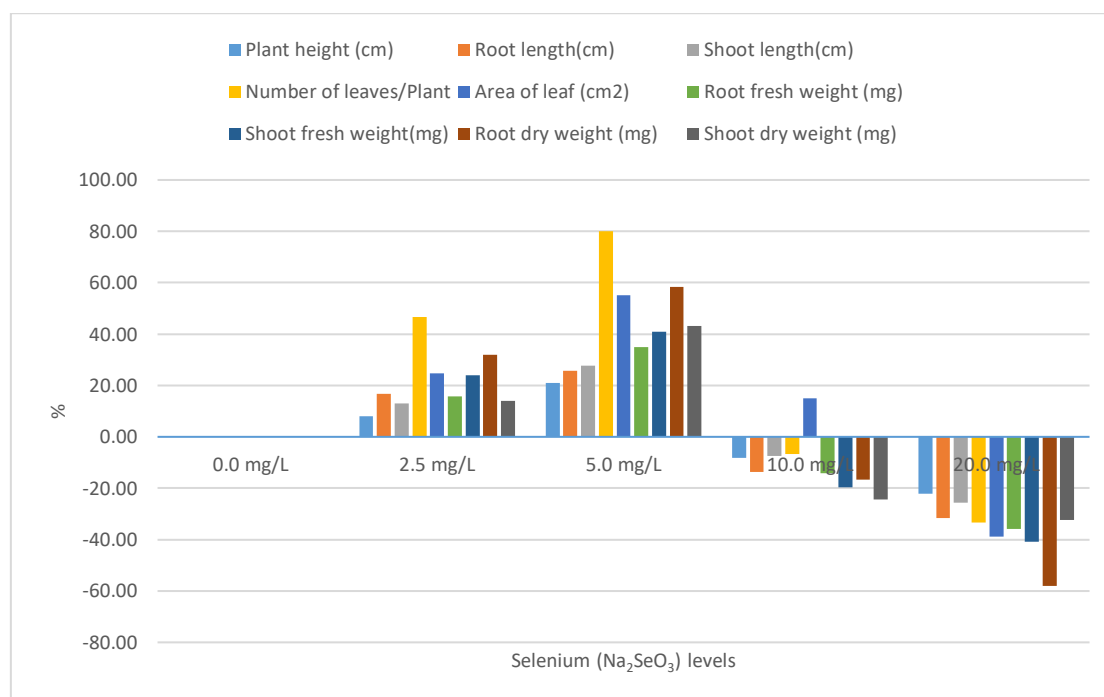

**Figure S1.** Relative increasing or decreasing in the growth parameters under various selenium levels (Na<sub>2</sub>SeO<sub>3</sub>) compared with quinoa plants' control treatment after 30 days of treatment. Comparisons of means for different selenium levels (Na<sub>2</sub>SeO<sub>3</sub>) at Alpha 0.05, Standard error for: plant height = 3.64, Root length = 3.10, shoot length = 3.20, number of leaves/plants = 4.10, Area of leaf = 3.60, root fresh weight = 3.20, shoot fresh weight = 3.30, root dry weight = 3.53 and shoot dry weight = 3.33.–

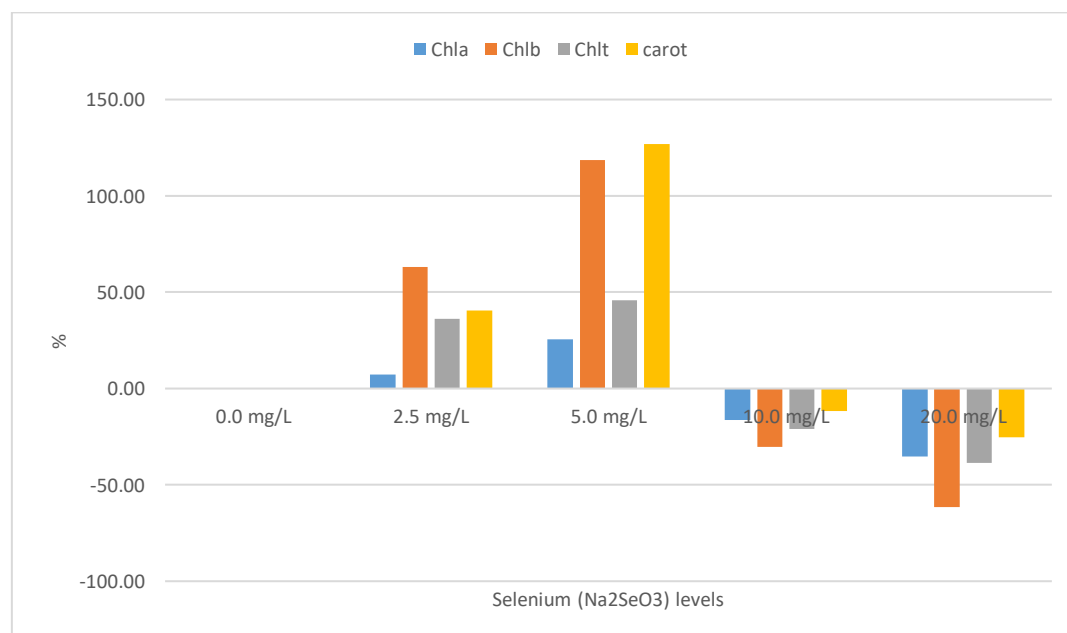

**Figure S2.** Relative increasing or decreasing in the photosynthetic pigments contents under various selenium levels (Na<sub>2</sub>SeO<sub>3</sub>) compare with quinoa plants' control treatment after 30 days of treatment. Comparisons of means for different selenium levels (Na<sub>2</sub>SeO<sub>3</sub>) at Alpha 0.05, the standard error for chlorophyll-a = 2.01, chlorophyll-b = 2.74, total chlorophyll = 2.21 and carotenoids = 3.01.

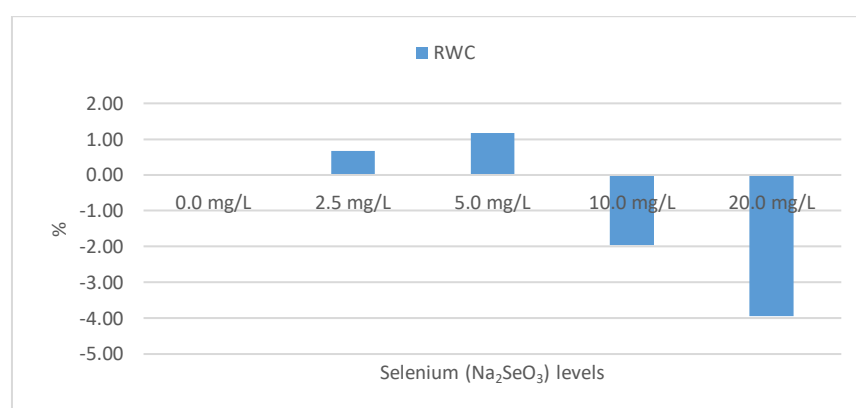

**Figure S3.** Relative increasing or decreasing in the relative water contents under various levels of selenium ( $\text{Na}_2\text{SeO}_3$ ) compare with the control treatment of quinoa plants after 30 days of treatment. Comparisons of means for different selenium levels ( $\text{Na}_2\text{SeO}_3$ ) at Alpha 0.05, the standard error for RWC = 1.11.

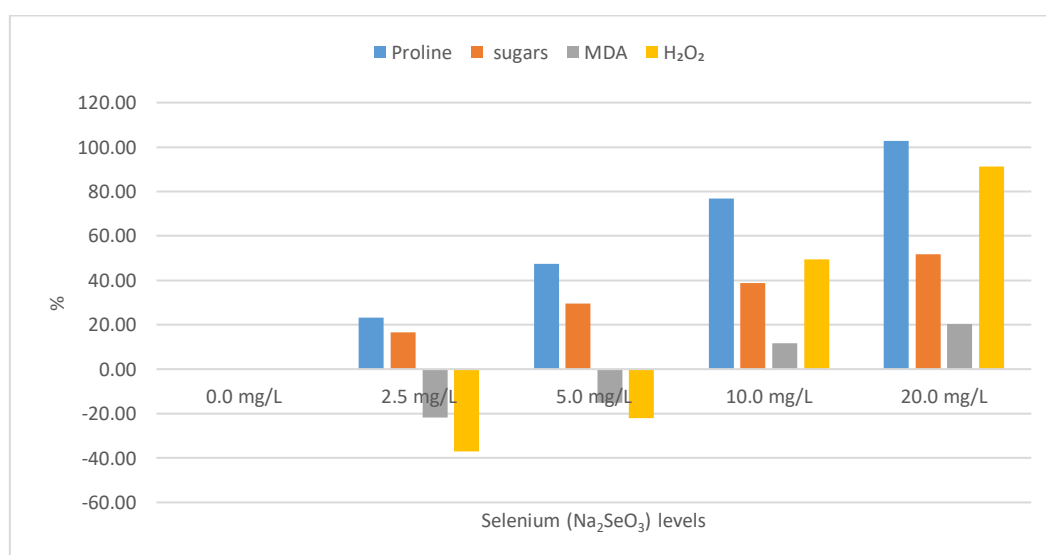

**Figure S4.** The relative increase in the proline and total soluble sugars under various levels of selenium ( $\text{Na}_2\text{SeO}_3$ ) compare with the control treatment of quinoa plants after 30 days. Comparisons of means for different selenium levels ( $\text{Na}_2\text{SeO}_3$ ) at Alpha 0.05, the standard error for proline = 4.01 and total soluble sugar = 3.20, MDA = 2.42 and  $\text{H}_2\text{O}_2$  = 3.46.

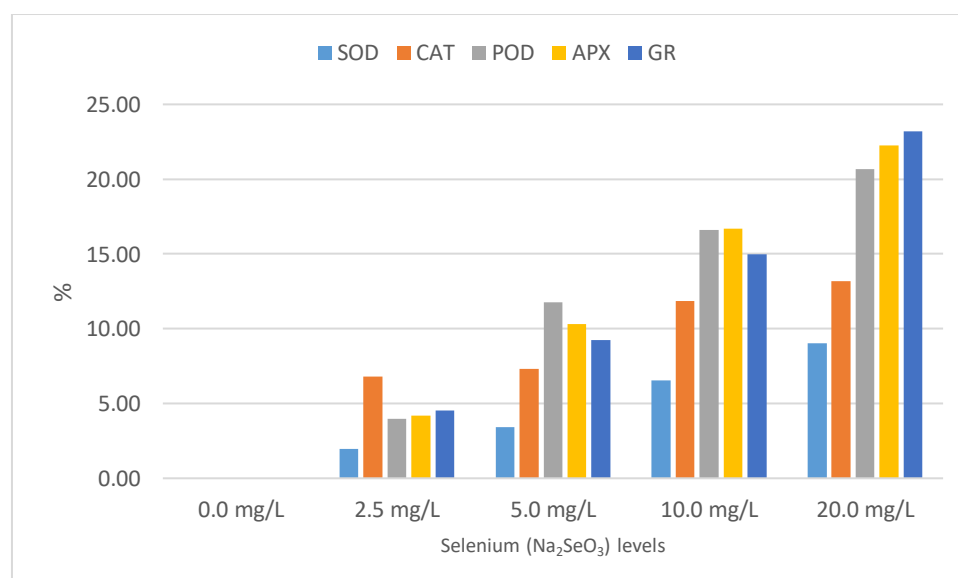

**Figure S5.** The relative increase in antioxidant enzyme activity under various levels of selenium ( $\text{Na}_2\text{SeO}_3$ ) compare with the control treatment of quinoa plants after 30 days. Comparisons of means for different selenium levels ( $\text{Na}_2\text{SeO}_3$ ) at Alpha 0.05, the standard error for SOD = 2.40, CAT = 2.50, POD = 2.61, APX = 2.62 and GR = 2.62.
